# Supplementary material
Source: HighWire-hosted journal article supplement (https://rmdopen.bmj.com/content/10/3/e004190)

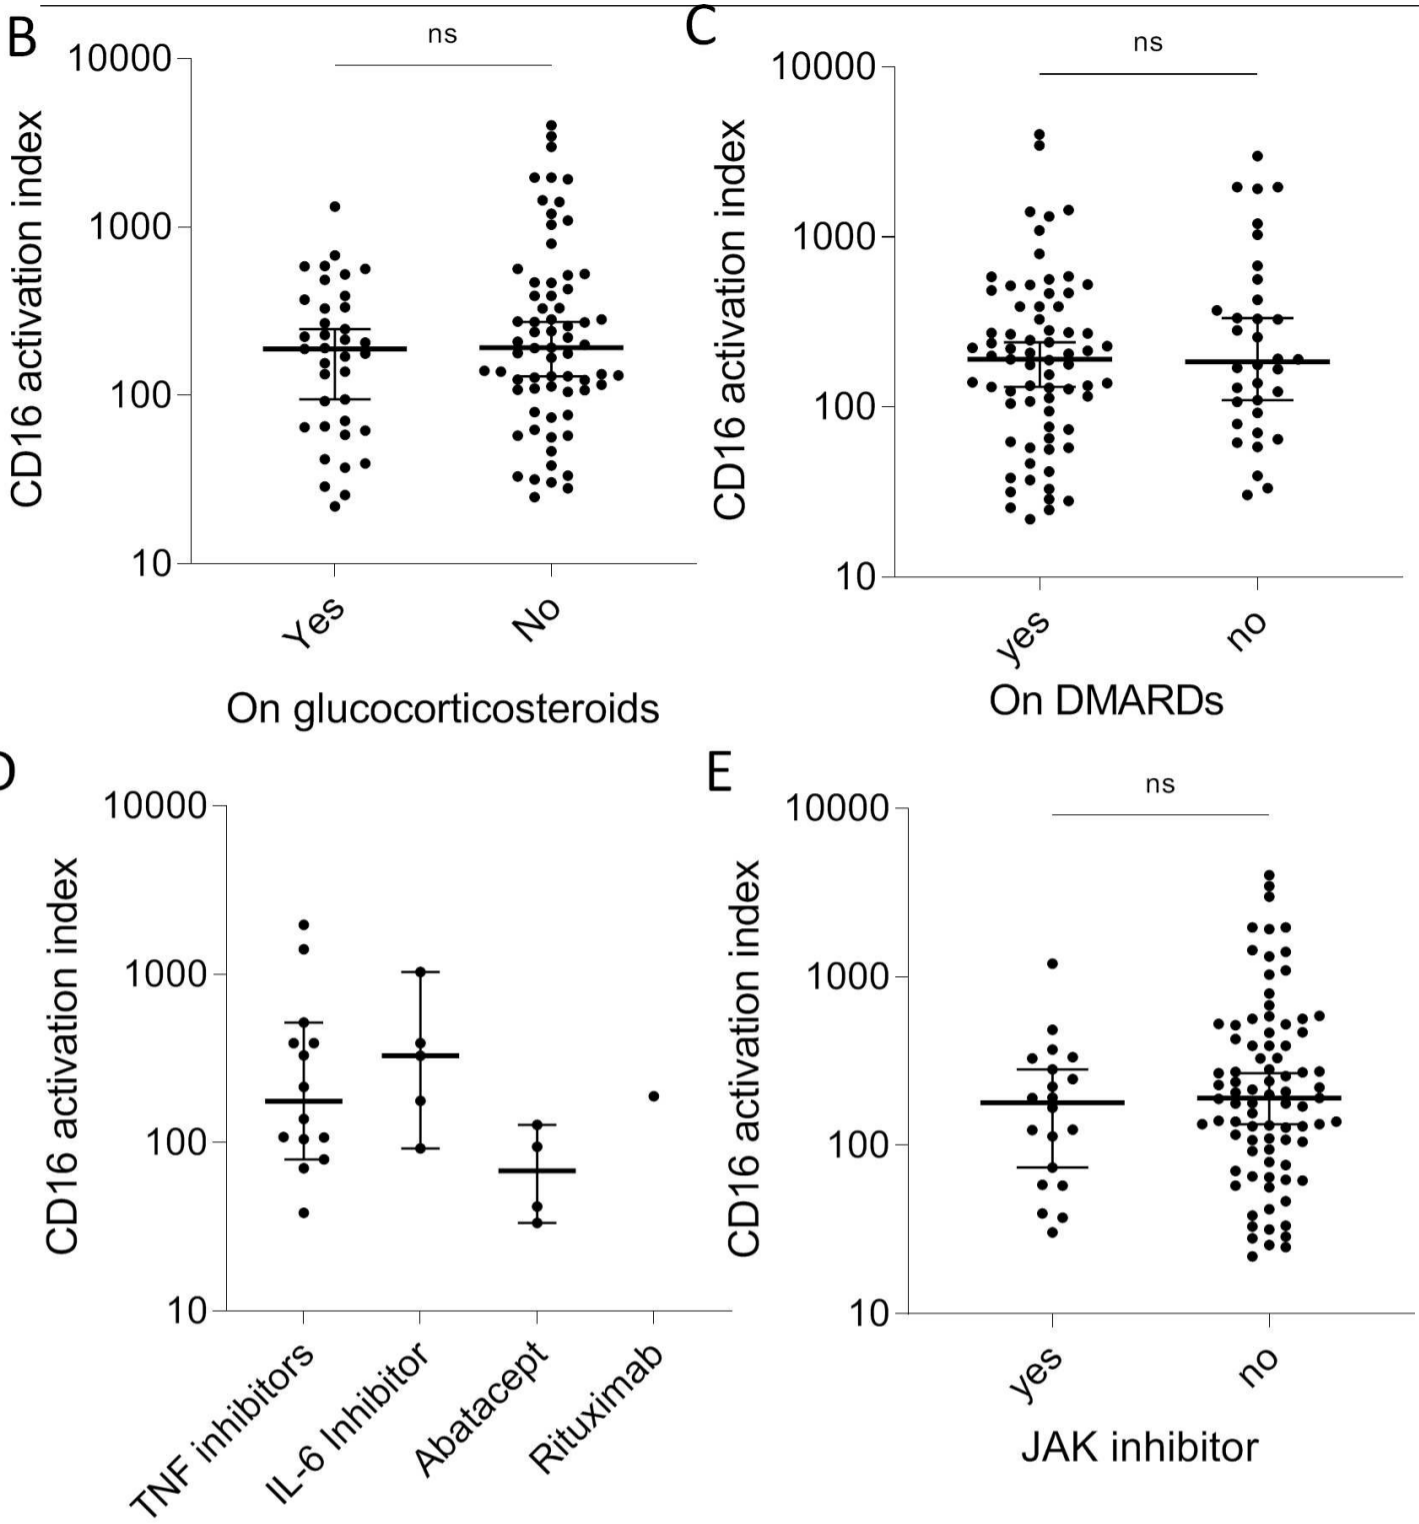

Fig s2

Supplement: inline-supplementary-material-3 [file inline-supplementary-material-3.pdf]
